# Supplementary material for: Spheroid-cultured human umbilical cord-derived mesenchymal stem cells attenuate hepatic ischemia-reperfusion injury in rats
Source: PubMed Central journal article supplement (PMC5802716; doi:10.1038/s41598-018-20975-0), 2018-02-06
Supplement: 41598_2018_20975_MOESM1_ESM.pdf [file 41598_2018_20975_MOESM1_ESM.pdf]

---

# **Spheroid-cultured human umbilical cord-derived mesenchymal stem cells attenuate hepatic ischemia-reperfusion injury in rats**

Yi Sun<sup>1,2,3</sup>, Yang Wang<sup>1,2,3</sup>, Liang Zhou<sup>4</sup>, Yizhou Zou<sup>5</sup>, Gengwen Huang<sup>6</sup>, Ge Gao<sup>7</sup>, Shi Ting<sup>7</sup>, Xiong Lei<sup>6</sup> and Xiang Ding<sup>8,\*</sup>

<sup>1</sup> Institute of Reproductive and Stem Cell Engineering, School of Basic Medical Science, Central South University, Changsha, 410078, China.

<sup>2</sup> National Engineering and Research Center of Human Stem Cell, Central South University, Changsha, 410250, China.

<sup>3</sup> Key Laboratory of Stem Cells and Reproductive Engineering, Ministry of Health, Changsha, 410250, China.

<sup>4</sup> Department of Ophthalmology, Second Xiangya Hospital, Central South University, Changsha, 410011, China.

<sup>5</sup> Department of Immunology, Xiangya School of Medicine, Central South University, Changsha, 410078, China.

<sup>6</sup> Department of General Surgery, Xiangya Hospital, Central South University, Changsha, 410078, China.

---

<sup>7</sup> Department of Laboratory Medicine, Xiangya School of Medicine, Central South University, Changsha, 410013, China.

<sup>8</sup> Department of Organ Transplantation, Xiangya Hospital, Central South University, Changsha, 410078, China.

\*Corresponding Author: [xiangding@csu.edu.cn](mailto:xiangding@csu.edu.cn)

Supplementary Table 1. The differential regulated genes enriched in the biological process of positive regulation of angiogenesis

| GeneID | Symbol  | FPKM1<br>(3D UC-MSCs) | FPKM2<br>(2D UC-MSCs) | log2 ratio of<br>FPKM1/FPKM2 | Probability |
|--------|---------|-----------------------|-----------------------|------------------------------|-------------|
| 694    | BTG1    | 55.91666667           | 10.00333333           | 2.482797543                  | 0.90884021  |
| 3576   | IL8     | 3089.476667           | 787.1533333           | 1.97264588                   | 0.899162287 |
| 133    | ADM     | 141.3366667           | 9.623333333           | 3.876455278                  | 0.948887386 |
| 51129  | ANGPTL4 | 426.17                | 7.416666667           | 5.844514298                  | 0.982916211 |
| 1116   | CHI3L1  | 148.4766667           | 7.656666667           | 4.277375966                  | 0.958643356 |
| 57105  | CYSLTR2 | 4.91                  | 1.2                   | 2.032688619                  | 0.818027299 |
| 1545   | CYP1B1  | 8.043333333           | 1.01                  | 2.993438217                  | 0.886267062 |
| 3162   | HMOX1   | 87.16333333           | 6.516666667           | 3.741515263                  | 0.945496644 |
| 3082   | HGF     | 225.11                | 91.97666667           | 1.291290328                  | 0.867483567 |
| 3552   | IL1A    | 88.58                 | 37.42                 | 1.243171439                  | 0.862237022 |
| 3553   | IL1B    | 1811.013333           | 485.1633333           | 1.900254741                  | 0.897427893 |
| 388    | RHOB    | 132.9766667           | 35.26666667           | 1.914795993                  | 0.895520058 |
| 7291   | TWIST1  | 39.15333333           | 7.593333333           | 2.366329891                  | 0.905683612 |
| 7422   | VEGFA   | 572.1733333           | 157.5366667           | 1.860764606                  | 0.896621399 |
| 80149  | ZC3H12A | 38.53666667           | 13.25333333           | 1.539876532                  | 0.87299027  |

Supplementary Table 2. The differential regulated genes enriched in the inflammatory process

| GeneID | Symbol | FPKM1<br>(3D UC-MSCs) | FPKM2<br>(2D UC-MSCs) | log2 ratio of<br>FPKM1/FPKM2 | Probability |
|--------|--------|-----------------------|-----------------------|------------------------------|-------------|
| 604    | BCL6   | 38.4                  | 10.56333333           | 1.862041152                  | 0.888729903 |
| 6364   | CCL20  | 27.22                 | 0.666666667           | 5.351557662                  | 0.969717467 |
| 6349   | CCL3L1 | 4.336666667           | 0.01                  | 8.760442746                  | 0.923582566 |
| 414062 | CCL3L3 | 4.193333333           | 0.693333333           | 2.596476489                  | 0.82721092  |
| 6352   | CCL5   | 56.4                  | 8.573333333           | 2.717767021                  | 0.915387551 |
| 6354   | CCL7   | 51.78666667           | 12.89666667           | 2.005582472                  | 0.897714068 |
| 2920   | CXCL2  | 82.52666667           | 14.62333333           | 2.496588164                  | 0.910748044 |
| 2921   | CXCL3  | 165.32                | 43.23666667           | 1.934934061                  | 0.89627452  |
| 3576   | IL8    | 3089.476667           | 787.1533333           | 1.97264588                   | 0.899162287 |
| 7852   | CXCR4  | 9.77                  | 0.563333333           | 4.116297816                  | 0.928248088 |
| 1051   | CEBPB  | 59.68                 | 24.48666667           | 1.28525114                   | 0.862627261 |
| 929    | CD14   | 3.476666667           | 0.2                   | 4.119632847                  | 0.856869071 |
| 1999   | ELF3   | 7.293333333           | 0.08                  | 6.510434522                  | 0.949251609 |
| 1969   | EPHA2  | 11.11333333           | 35.21666667           | -1.663966758                 | 0.88313648  |
| 2353   | FOS    | 14.84666667           | 2.69                  | 2.46446098                   | 0.89372496  |
| 8111   | GPR68  | 30.08333333           | 6.78                  | 2.149607253                  | 0.896213816 |
| 5971   | RELB   | 22.51333333           | 6.546666667           | 1.78194725                   | 0.880578247 |

---

|       |           |             |             |              |             |
|-------|-----------|-------------|-------------|--------------|-------------|
| 7130  | TNFAIP6   | 57.43666667 | 13.42333333 | 2.097229053  | 0.900003469 |
| 4982  | TNFRSF11B | 87.02       | 24.76666667 | 1.812947307  | 0.89240682  |
| 7133  | TNFRSF1B  | 8.243333333 | 2.166666667 | 1.927750616  | 0.850972128 |
| 27242 | TNFRSF21  | 37.41666667 | 11.93666667 | 1.648281021  | 0.883153823 |
| 8771  | TNFRSF6B  | 9.606666667 | 31.36333333 | -1.706971064 | 0.883370623 |
| 10318 | TNIP1     | 174.6166667 | 74.05333333 | 1.237554685  | 0.864517752 |
| 135   | ADORA2A   | 11.10666667 | 0.896666667 | 3.630710323  | 0.921093709 |
| 301   | ANXA1     | 62.17       | 244.6733333 | -1.976566388 | 0.898364466 |
| 650   | BMP2      | 8.37        | 0.596666667 | 3.810230536  | 0.915656382 |
| 623   | BDKRB1    | 188.1266667 | 77.91333333 | 1.27176222   | 0.866078707 |
| 624   | BDKRB2    | 71.17       | 22.08       | 1.688529064  | 0.8884524   |
| 1116  | CHI3L1    | 148.4766667 | 7.656666667 | 4.277375966  | 0.958643356 |
| 9734  | HDAC9     | 4.786666667 | 0.79        | 2.599096785  | 0.840140833 |
| 3552  | IL1A      | 88.58       | 37.42       | 1.243171439  | 0.862237022 |
| 3553  | IL1B      | 1811.013333 | 485.1633333 | 1.900254741  | 0.897427893 |
| 3656  | IRAK2     | 29.76333333 | 4.75        | 2.647536691  | 0.910886796 |
| 11009 | IL24      | 10.12666667 | 0.193333333 | 5.710925159  | 0.956562083 |
| 3569  | IL6       | 489.4766667 | 35.79666667 | 3.773342931  | 0.948098236 |
| 3988  | LIPA      | 9.603333333 | 22.92       | -1.254999884 | 0.849463205 |
| 11343 | MGLL      | 12.14333333 | 30.19       | -1.313906262 | 0.858065803 |
| 4791  | NFKB2     | 52.84666667 | 19.14333333 | 1.464970415  | 0.871299235 |

---

---

|       |          |               |              |              |             |
|-------|----------|---------------|--------------|--------------|-------------|
| 5806  | PTX3     | 8.806666667   | 108.87333333 | -3.627910763 | 0.94350209  |
| 8605  | PLA2G4C  | 6.2933333333  | 2.106666667  | 1.578862301  | 0.815165548 |
| 55848 | PLGRKT   | 1.75          | 5.926666667  | -1.759865996 | 0.820169277 |
| 5742  | PTGS1    | 5.3033333333  | 0.8133333333 | 2.704980783  | 0.850824705 |
| 5743  | PTGS2    | 1473.01       | 259.13333333 | 2.507000713  | 0.913991363 |
| 8767  | RIPK2    | 82.786666667  | 25.673333333 | 1.689127809  | 0.889094126 |
| 8986  | RPS6KA4  | 4.2733333333  | 9.6833333333 | -1.180141902 | 0.809424701 |
| 8482  | SEMA7A   | 17.7333333333 | 52.706666667 | -1.571521709 | 0.877083442 |
| 12    | SERPINA3 | 9.176666667   | 1.966666667  | 2.22221775   | 0.868723659 |
| 6335  | SCN9A    | 0.136666667   | 3.12         | -4.512812715 | 0.854518966 |
| 6382  | SDC1     | 4.6           | 27.343333333 | -2.571483361 | 0.904790398 |
| 7057  | THBS1    | 68.046666667  | 150.49       | -1.145071227 | 0.858369322 |
| 9473  | THEMIS2  | 8.36          | 2.22         | 1.912943266  | 0.851249631 |
| 80149 | ZC3H12A  | 38.536666667  | 13.253333333 | 1.539876531  | 0.87299027  |
| 85463 | ZC3H12C  | 18.093333333  | 5.336666667  | 1.761447413  | 0.875878037 |

---

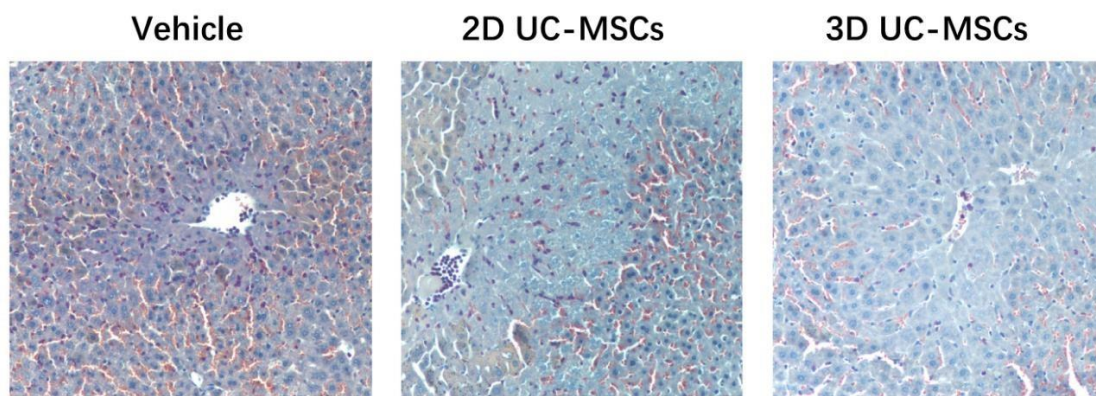

Supplementary figure 1. The representative picture ( $\times 400$ ) of chloracetate esterase staining of neutrophils (purple) at 24 h after hepatic IRI. Significantly less neutrophils infiltrated into the liver in 3D UC-MSCs treatment compared with vehicle and 2D UC-MSCs treatment groups.

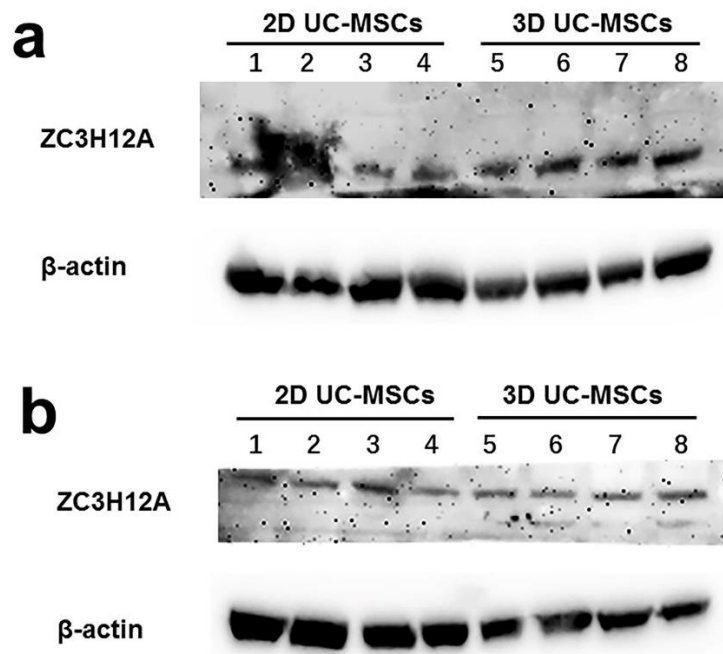

Supplementary figure 2. Two independent Western Blotting experiments were performed to confirm the expression of ZC3H12A protein in UC-MSCs. The cell culture and Blotting were described in Methods. The ZC3H12A protein levels were normalized to corresponding  $\beta$ -actin levels. Both experiments showed that the ZC3H12A level was significantly higher in 3D UC-MSCs group compared with 2D UC-MSCs group. a) The full-length gel of first Western Blotting experiment was shown, the No 2 sample of 2D UC-MSCs was excluded from statistics due to too much background. b) The second independent Western Blotting experiment was performed with the protein samples from another batch of recovered and cultured UC-MSCs cells. The result also showed that the ZC3H12A protein level was higher in 3D UC-MSCs when normalized to the  $\beta$ -actin level.
